# Supplementary material for: STORMSeq: An Open-Source, User-Friendly Pipeline for Processing Personal Genomics Data in the Cloud
Source: PLOS journal article supplement (doi:10.1371/journal.pone.0084860), 2014-01-15
Supplement: S1 (10.1371/journal.pone.0084860.s001) [file journal.pone.0084860.s001]

# STORMSeq

## Scalable Tools for Open-source Read Mapping

### Setup

#### Load your data

Create an S3 bucket as described on the [STORMSeq page](#) and upload your files.

AWS Account Number:

Access Key ID:

Secret Access Key:

Amazon S3 bucket:

Request type:

Hourly price of Large instances as of 3/1/13: \$0.24

#### Set your parameters

Data type:

Number of genomes:

Name your genome:

Genome version:

dbSNP version:

Alignment:

Cleaning Pipeline: GATK

SNP Calling:

- Indel Calling
- SV Calling (Coming soon!)
- Output gVCF (Coming soon!)

[Advanced settings](#)

#### Start processing

**GO!**

**Note that by clicking "GO!", you are starting up Amazon instances and volumes that will be charged to your account.**

The mapping and variant calling for a whole genome (30X coverage) is estimated at about \$30. For a full exome (50X coverage), the cost is estimated at about \$2. However, note that these estimates do not include storage (S3) and that processing times (and thus costs) may vary.

Cancel

### Progress

#### Pipeline progress

Page will automatically refresh every 5 minutes. Click [here](#) to refresh manually.

Checking progress... \*

### Download

#### Download your results

### Visualize

#### Visualize your results

Page will automatically refresh when results are available. Click [here](#) to refresh manually.

Refreshing results... \*
